# Supplementary material
Source: PubMed Central journal article supplement (PMC7875459)
Supplement: bm0c01621_si_001.pdf [file bm0c01621_si_001.pdf]

**Supporting Information**

**Capturing the Real Time Hydrolytic Degradation of a Library of Biomedical Polymers by Combining Traditional Assessment and Electrochemical Sensors**

Tiziana Fuoco,<sup>1</sup> Maria Cuartero,<sup>2</sup> Marc Parrilla,<sup>2</sup> Juan José García-Guzmán,<sup>2</sup> Gaston A. Crespo<sup>2,\*</sup> and Anna Finne-Wistrand<sup>1,\*</sup>

*<sup>1</sup>Department of Fibre and Polymer Technology, School of Engineering Sciences in Chemistry, Biotechnology and Health, KTH Royal Institute of Technology, Teknikringen, 56-58, SE 100-44 Stockholm, Sweden*

*<sup>2</sup>Department of Chemistry, School of Engineering Sciences in Chemistry, Biotechnology and Health, KTH Royal Institute of Technology, Teknikringen 30, SE-100 44, Stockholm, Sweden.*

\* Corresponding authors: gacp@kth.se; annaf@kth.se

## Tables

**Table S1.** Molar mass ( $M_n$ ) and dispersity ( $\mathcal{D}$ ) values of the evaluated polymers over the degradation time. T0-T4 are respectively 0, 5, 10, 15 and 20 days for PLLA, PDLLA, PLTMC, PCLA, PCL; 0, 5, 7, 10, 15 days for PLGA and PCLDX and 0, 2, 5, 7 and 10 days for PDLLGA. N=3 in all the cases.

| Polymer | T0                               |               | T1                               |               | T2                               |               | T3                               |               | T4                               |               |
|---------|----------------------------------|---------------|----------------------------------|---------------|----------------------------------|---------------|----------------------------------|---------------|----------------------------------|---------------|
|         | $M_n$<br>(kg mol <sup>-1</sup> ) | $\mathcal{D}$ |
| PLLA    | 144.8                            | 1.5           | 15.0 ± 3.0                       | 2.2 ± 0.05    | 10.0 ± 1.5                       | 2.4 ± 0.3     | 4.0 ± 0.1                        | 4.4 ± 0.7     | 3.0 ± 0.1                        | 4.2 ± 0.1     |
| PLGA    | 142.1                            | 1.5           | 1.4 ± 0.1                        | 3.2 ± 0.5     | 1.0 ± 0.05                       | 3.3 ± 0.2     | 0.5 ± 0.05                       | 4.5 ± 0.5     | 0.3 ± 0.01                       | 5.1 ± 0.2     |
| PDLLA   | 136.6                            | 1.6           | 65.8 ± 3.0                       | 2.2 ± 0.1     | 7.4 ± 1.0                        | 2.3 ± 0.4     | 0.9 ± 0.05                       | 4.2 ± 0.5     | 0.2 ± 0.01                       | 5.1 ± 0.2     |
| PDLLGA  | 97.7                             | 1.6           | 19.0 ± 1.9                       | 3.0 ± 0.1     | 0.4 ± 0.1                        | 4.2 ± 0.2     | 0.1 ± 0.1                        | 3.9 ± 0.4     | –                                | –             |
| PCLA    | 114.7                            | 1.6           | 33.1 ± 5.0                       | 3.0 ± 0.1     | 13.6 ± 5.3                       | 2.8 ± 0.5     | 2.9 ± 0.3                        | 4.2 ± 0.1     | 1.5 ± 0.2                        | 5.0 ± 0.6     |
| PLTMC   | 134.2                            | 1.6           | 133.5 ± 6.8                      | 2.0 ± 0.1     | 127.3 ± 1.6                      | 1.0 ± 0.0     | 108.7 ± 1.5                      | 1.8 ± 0.0     | 92.1 ± 3.4                       | 1.9 ± 0.1     |
| PCL     | 114.7                            | 1.8           | 87.3 ± 5.7                       | 2.0 ± 0.1     | 70.8 ± 4.3                       | 2.1 ± 0.0     | 44.8 ± 5.1                       | 2.5 ± 0.1     | 38.4 ± 2.2                       | 2.7 ± 0.4     |
| PCLDX   | 78.3                             | 1.8           | 20.6 ± 2.3                       | 2.0 ± 0.0     | 16.8 ± 2.2                       | 2.1 ± 0.3     | 8.6 ± 0.6                        | 2.8 ± 0.2     | 4.6 ± 0.3                        | 3.3 ± 0.2     |

**Table S2.** Apparent constants of hydrolysis rate extrapolated for the evaluated polymers.

| Polymer | k (days <sup>-1</sup> ) |
|---------|-------------------------|
| PLLA    | 0.11                    |
| PLGA    | 0.17                    |
| PDLLA   | 0.40                    |
| PDLLGA  | 1.03                    |
| PCLA    | 0.22                    |
| PLTMC   | 0.02                    |
| PCL     | 0.07                    |
| PCLDX   | 0.15                    |

**Table S3.** Mass loss (%) values of the evaluated polymers over the degradation time. T1-T4 are respectively 5, 10, 15 and 20 days for PLLA, PDLLA, PLTMC, PCLA, PCL; 5, 7, 10, 15 days for PLGA and PCLDX and 2, 5, 7 and 10 days for PDLLGA. PDLLGA has an extra time point at 15 days: mass loss = 100 %. N=3 in all the cases.

| Polymer             | T1         | T2         | T3         | T4         |
|---------------------|------------|------------|------------|------------|
| PLLA                | 6.8 ± 1.2  | 11.6 ± 1.1 | 16.7 ± 1.0 | 18.3 ± 4.1 |
| PLGA                | 23.4 ± 0.9 | 37.7 ± 0.9 | 46.5 ± 1.0 | 52.3 ± 3.1 |
| PDLLA               | 5.9 ± 1.4  | 18.3 ± 3.4 | 38.6 ± 4.4 | 77.0 ± 7.4 |
| PDLLGA <sup>b</sup> | 7.8 ± 0.1  | 47.2 ± 2.1 | 79.8 ± 0.5 | 95.2 ± 1.1 |
| PCLA                | 1.6 ± 1.4  | 4.2 ± 2.5  | 15.8 ± 5.0 | 24.4 ± 2.2 |
| PLTMC               | 4.3 ± 0.8  | 5.2 ± 0.4  | 4.8 ± 0.5  | 5.0 ± 0.2  |
| PCL                 | 0.6 ± 0.2  | 1.0 ± 0.5  | 1.3 ± 0.2  | 1.1 ± 0.4  |
| PCLDX               | 8.5 ± 2.5  | 12.5 ± 1.4 | 20.1 ± 4.0 | 22.6 ± 4.1 |

**Table S4.** pH values of the incubation media for each of the evaluated polymers over the degradation time. T1-T4 are respectively 5,10, 15 and 20 days for PLLA, PDLLA, PLTMC, PCLA, PCL; 5, 7, 10, 15 days for PLGA and PCLDX and 2, 5, 7 and 10 days for PDLLGA. PDLLGA has an extra time point at 15 days: pH = 3.3 ± 0.0. N=3 in all the cases.

| Polymer             | T1         | T2        | T3        | T4        |
|---------------------|------------|-----------|-----------|-----------|
| PLLA                | 7.4 ± 0.0  | 7.4 ± 0.0 | 7.2 ± 0.1 | 7.2 ± 0.0 |
| PDLLA               | 7.6 ± 0.0  | 7.5 ± 0.0 | 6.2 ± 0.1 | 3.9 ± 0.1 |
| PLGA                | 6.8 ± 0.0  | 5.8 ± 0.1 | 4.3 ± 0.1 | 3.8 ± 0.0 |
| PDLLGA <sup>b</sup> | 7.5 ± 0.01 | 5.5 ± 0.6 | 3.6 ± 0.0 | 3.3 ± 0.0 |
| PLTMC               | 7.6 ± 0.0  | 7.6 ± 0.0 | 7.6 ± 0.0 | 7.5 ± 0.2 |
| PLCA                | 7.5 ± 0.0  | 7.3 ± 0.1 | 7.0 ± 0.0 | 6.6 ± 0.1 |
| PCL                 | 7.5 ± 0.0  | 7.5 ± 0.0 | 7.6 ± 0.0 | 7.4 ± 0.1 |
| PCLDX               | 7.4 ± 0.0  | 7.4 ± 0.0 | 7.3 ± 0.0 | 7.1 ± 0.2 |

**Table S5.** L-lactate concentration [ $\mu\text{M}$ ] in the incubation media for each of the evaluated polymers containing L-lactide as monomeric unit over the degradation time. T1-T4 are respectively 5,10, 15 and 20 days for PLLA, PDLLA, PLTMC, PCLA, PCL; 5, 7, 10, 15 days for PLGA and PCLDX and 2, 5, 7 and 10 days for PDLLGA. PDLLGA has an extra time point at 15 days. L-lactate concentration = 5175 ± 473  $\mu\text{M}$ . N=3 in all the cases.

| Polymer             | T1          | T2         | T3         | T4         |
|---------------------|-------------|------------|------------|------------|
| PLLA                | 157 ± 82    | 197 ± 17   | 559 ± 90   | 855 ± 83   |
| PLGA                | 753 ± 71    | 2743 ± 389 | 4000 ± 172 | 5249 ± 433 |
| PDLLA               | –           | 29 ± 20    | 1282 ± 72  | 3740 ± 162 |
| PDLLGA <sup>b</sup> | 78.1 ± 11.2 | 422 ± 22   | 2268 ± 149 | 4078 ± 231 |
| PLCA                | 51 ± 13     | 253 ± 88   | 1217 ± 90  | 2286 ± 164 |
| PLTMC               | –           | –          | –          | –          |

**Table S6.** Linear fitting of pH as function of the mass loss (Figure 6c).

| Polymer | Linear fitting equation    | R <sup>2</sup> |
|---------|----------------------------|----------------|
| PLLA    | pH = -0.02 Mass loss + 7.6 | 0.84           |
| PDLLA   | pH = -0.05 Mass loss + 8.2 | 0.98           |
| PLGA    | pH = -0.10 Mass loss + 9.4 | 0.96           |
| PDLLGA  | pH = -0.05 Mass loss + 7.9 | 0.99           |
| PCLA    | pH = -0.04 Mass loss + 7.5 | 0.98           |

**Table S7.** Linear fitting of the L-Lactate released (%) as function of the mass loss (Figure 6d).

| Polymer | Linear fitting equation            | R <sup>2</sup> |
|---------|------------------------------------|----------------|
| PLLA    | L-Lactate = 0.72 Mass loss - 13.6  | 0.997          |
| PDLLA   | L-Lactate = 0.53 Mass loss - 9.9   | 0.999          |
| PDLLGA  | L-Lactate = 1.89 Mass loss - 118.7 | 0.95           |

### Calculation for the L-lactate released %

**Eq. S1.**

$$L - lactate\ released\ \% = \frac{[L - lactate]_t}{[L - lactate]_{max}} \times 100$$

Where  $[L - lactate]_t$  is the concentration measured at specific time in the incubation medium and the  $[L - lactate]_{max}$  is the maximum concentration expected for a total degradation of each polymer and it is calculated based on the composition.

As an example, calculation for the  $[L - lactate]_{max}$  of PLGA is reported.

**Eq. S2.**

$$\left\{ \begin{array}{l} mol\% LA : mol\% GA = 82:18 \\ \left( mol\% LA \times 144.12 \frac{g}{mol} \right) + \left( mol\% GA \times 116.07 \frac{g}{mol} \right) = m(mg) \end{array} \right.$$

By solving the system of equation and knowing the mass (m) in mg of each film sample and that, the total volume of the incubation medium is 0.030 L:

**Eq. S3.**

$$[L - lactate]_{max}(\mu M) = \frac{\frac{m(mg)}{169.63 \frac{g}{mol}} \times 2}{0.030 L}$$
